# Supplementary material for: Neck linker docking is critical for Kinesin-1 force generation in cells but at a cost to motor speed and processivity
Source: eLife journal article supplement (doi:10.7554/elife.44146), 2019-05-14
Supplement: supp [file elife-44146-supp-v1.zip]

Archive with 18 entries (18 files):
- elife_poa_e44146_Figure_6_figure_supplement_1.ai
- elife_poa_e44146_Figure_5_figure_supplement_1.ai
- elife_poa_e44146_Figure_1_figure_supplement_1.ai
- elife_poa_e44146_Video_2.mp4
- elife_poa_e44146_Video_1.mp4
- elife_poa_e44146_Figure_6_figure_supplement_2.ai
- elife_poa_e44146_Figure_7_figure_supplement_1.ai
- elife_poa_e44146_Figure_1_figure_supplement_2.ai
- elife_poa_e44146_Figure_4_figure_supplement_1.ai
- elife_poa_e44146_Figure_2_figure_supplement_1.ai
- elife_poa_e44146_Figure_7_figure_supplement_3.ai
- elife_poa_e44146_Supplementary_File_4.ai
- elife_poa_e44146_Transparent_Reporting_File.pdf
- elife_poa_e44146_Supplementary_File_3.xlsx
- elife_poa_e44146_Video_3.mp4
- elife_poa_e44146_Figure_7_figure_supplement_2.ai
- elife_poa_e44146_Supplementary_File_1.xlsx
- elife_poa_e44146_Supplementary_File_2.xlsx
