# Supplementary material for: Neck linker docking is critical for Kinesin-1 force generation in cells but at a cost to motor speed and processivity
Source: eLife journal article supplement (doi:10.7554/elife.44146), 2019-05-14
Supplement: supp [file elife-44146-supp-v1.zip › elife_poa_e44146_Supplementary_File_1.xlsx]

## Sheet: dist_table
Supplementary File 1. Average Residue-Residue Distances From Molecular Dynamics Simulations
Positions	ATP distance (Å)	apo distance (Å)	apo-ATP distance (Å)	ATP masked distance (Å)	apo masked distance (Å)	apo-ATP masked distance (Å)
P4 (CS) – V331 (NL)	5.52 (2.53)	28.61 (5.73)	23.09	4.77	6.55	1.78
A5 (CS) – V331 (NL)	4.69 (2.47)	28.09 (4.81)	23.4	4.15	6.55	2.4
A5 (CS) – T330 (NL)	6.02 (3.36)	26.51 (3.43)	20.49	4.65	6.55	1.9
A5 (CS) – N295 (Loop 13)	9.72 (3.19)	6.23 (3.58)	-3.49	6.44	4.81	-1.63
E6 (CS) – V331 (NL)	4.80 (0.72)	25.76 (3.46)	20.96	4.75	6.55	1.8
E6 (CS) – N329 (NL)	4.60 (1.46)	21.85 (2.27)	17.25	4.45	6.55	2.1
E6 (CS) – K328 (NL)	4.31 (1.66)	19.00 (2.65)	14.69	4.14	6.55	2.41
E6 (CS) – G294 (Loop 13)	9.09 (1.63)	4.98 (2.24)	-4.11	6.53	4.46	-2.07
E6 (CS) – N295 (Loop 13)	9.72 (1.80)	5.65 (2.36)	-4.07	6.55	4.9	-1.65
C7 (CS) – V331 (NL)	4.01 (0.55)	24.83 (2.54)	20.82	4	6.55	2.55
C7 (CS) – N329 (NL)	2.89 (0.13)	20.74 (2.05)	17.85	2.89	6.55	3.66
C7 (CS) – K328 (NL)	3.45 (0.24)	17.57 (2.61)	14.12	3.45	6.55	3.1
C7 (CS) – I327 (NL)	4.52 (0.28)	15.24 (2.16)	10.72	4.52	6.55	2.03
C7 (CS) – G294 (Loop 13)	7.68 (1.50)	4.30 (2.17)	-3.38	6.35	3.94	-2.41
S8 (CS) – N329 (NL)	4.61 (0.48)	19.57 (3.71)	14.96	4.6	6.55	1.95
S8 (CS) – K328 (NL)	3.81 (0.49)	16.85 (4.78)	13.04	3.81	6.55	2.74
S8 (CS) – I327 (NL)	3.50 (0.22)	14.14 (4.15)	10.64	3.5	6.55	3.05
S8 (CS) – G294 (Loop 13)	9.74 (1.22)	5.07 (0.96)	-4.67	6.55	4.98	-1.57
I9 (CS) – N329 (NL)	3.86 (0.46)	17.28 (2.90)	13.42	3.86	6.55	2.69
I9 (CS) – K328 (NL)	4.59 (0.42)	14.42 (4.51)	9.83	4.58	6.55	1.97
I9 (CS) – I327 (NL)	2.98 (0.17)	12.28 (3.42)	9.3	2.98	6.55	3.57
I9 (CS) – A270 (α4)	9.02 (0.67)	4.87 (0.85)	-4.15	6.55	4.79	-1.76
I9 (CS) – S291 (α5)	4.62 (0.85)	8.54 (0.64)	3.92	4.57	6.54	1.97
I9 (CS) – K325 (α6)	3.88 (0.43)	7.25 (3.13)	3.37	3.88	5.54	1.66
I9 (CS) – L269 (α4)	6.44 (0.73)	4.07 (0.44)	-2.37	6	4.07	-1.93
I9 (CS) – I266 (α4)	6.12 (0.82)	3.95 (0.41)	-2.17	5.79	3.95	-1.84
V11 (β1) – K325 (α6)	3.75 (0.21)	7.35 (2.82)	3.6	3.75	5.66	1.91
R14 (β1) – P55 (β2d)	4.28 (1.30)	5.93 (0.47)	1.65	4.19	5.72	1.53
R16 (β1) – E22 (α0)	5.28 (2.58)	2.74 (0.08)	-2.54	4.62	2.74	-1.88
R16 (β1) – S307 (Loop 14)	6.39 (0.73)	4.51 (0.99)	-1.88	5.98	4.46	-1.52
N19 (α0) – M198 (Loop 9/Sw1)	3.91 (1.19)	9.93 (4.46)	6.02	3.82	5.78	1.96
A21 (α0) – N197 (Loop 9/Sw1)	5.06 (2.25)	12.57 (4.74)	7.51	4.56	6.32	1.76
K34 (β2a) – N334 (NL)	35.54 (0.93)	5.71 (3.07)	-29.83	6.55	4.67	-1.88
G44 (Loop 2c) – V333 (NL)	40.35 (0.74)	6.61 (3.31)	-33.74	6.55	4.98	-1.57
P46 (β2c) – S332 (NL)	31.10 (0.72)	5.24 (1.65)	-25.86	6.55	4.9	-1.65
P46 (β2c) – V331 (NL)	26.91 (0.63)	5.17 (1.90)	-21.74	6.55	4.79	-1.76
V48 (β2c) – I327 (NL)	11.33 (0.48)	5.29 (1.91)	-6.04	6.55	4.84	-1.71
V48 (β2c) – T326 (NL)	8.65 (0.53)	4.44 (1.77)	-4.21	6.54	4.16	-2.38
V48 (β2c) – K325 (α6)	3.20 (0.65)	6.45 (1.41)	3.25	3.19	5.82	2.63
F49 (Loop 2d) – K325 (α6)	4.57 (0.51)	7.98 (1.83)	3.41	4.55	6.29	1.74
E76 (α1) – V333 (NL)	4.42 (0.92)	39.35 (2.24)	34.93	4.37	6.55	2.18
G77 (α1) – N334 (NL)	2.97 (0.21)	41.82 (2.98)	38.85	2.97	6.55	3.58
G77 (α1) – V333 (NL)	3.56 (0.47)	41.35 (1.76)	37.79	3.56	6.55	2.99
G77 (α1) – S332 (NL)	4.94 (0.57)	40.06 (2.35)	35.12	4.89	6.55	1.66
Y78 (β3) – V333 (NL)	3.63 (0.25)	37.53 (1.83)	33.9	3.63	6.55	2.92
Y78 (β3) – N334 (NL)	4.50 (0.47)	38.19 (2.73)	33.69	4.49	6.55	2.06
Y78 (β3) – S332 (NL)	3.62 (0.28)	36.20 (2.49)	32.58	3.62	6.55	2.93
Y78 (β3) – V331 (NL)	3.97 (0.40)	35.16 (2.30)	31.19	3.97	6.55	2.58
Y78 (β3) – N295 (Loop 13)	5.67 (0.33)	3.75 (0.59)	-1.92	5.54	3.75	-1.79
N79 (β3) – N334 (NL)	3.61 (1.21)	36.68 (2.63)	33.07	3.57	6.55	2.98
N79 (β3) – S291 (α5)	7.35 (0.43)	3.76 (0.43)	-3.59	6.43	3.76	-2.67
N79 (β3) – D290 (α5)	5.35 (0.62)	3.04 (0.43)	-2.31	5.25	3.04	-2.21
G80 (β3) – S291 (α5)	5.56 (0.35)	3.56 (0.41)	-2	5.45	3.56	-1.89
T81 (β3) – L292 (Loop 13)	6.71 (0.38)	3.87 (0.35)	-2.84	6.2	3.87	-2.33
T81 (β3) – C296 (β8)	3.75 (0.48)	5.73 (0.32)	1.98	3.75	5.59	1.84
Y85 (β3) – G235 (Loop 11/Sw2)	7.13 (0.54)	4.08 (0.64)	-3.05	6.35	4.06	-2.29
Y85 (β3) – L262 (α4)	4.25 (0.46)	7.05 (0.49)	2.8	4.24	6.33	2.09
Y85 (β3) – A234 (Loop 11/Sw2)	6.14 (0.39)	3.74 (0.45)	-2.4	5.88	3.74	-2.14
G86 (P Loop) – S236 (Loop 11/Sw2)	3.61 (1.10)	6.31 (0.69)	2.7	3.58	5.93	2.35
Q87 (P Loop) – N310 (α6)	4.02 (1.47)	6.47 (0.53)	2.45	3.92	6.06	2.14
Q87 (P Loop) – K92 (P Loop)	3.54 (0.38)	5.23 (0.35)	1.69	3.54	5.17	1.63
T88 (P Loop) – E237 (Loop 11/Sw2)	4.24 (0.76)	8.03 (1.07)	3.79	4.21	6.43	2.22
T88 (P Loop) – S236 (Loop 11/Sw2)	3.83 (0.60)	7.53 (0.62)	3.7	3.83	6.44	2.61
T88 (P Loop) – G235 (Loop 11/Sw2)	3.70 (0.26)	6.60 (0.67)	2.9	3.7	6.09	2.39
T88 (P Loop) – E313 (α6)	6.95 (1.41)	4.42 (0.96)	-2.53	6.03	4.37	-1.66
S89 (P Loop) – T196 (Loop 9/Sw1)	4.51 (0.96)	8.24 (2.07)	3.73	4.48	6.26	1.78
K92 (P Loop) – G235 (Loop 11/Sw2)	3.67 (0.31)	5.71 (0.39)	2.04	3.67	5.57	1.9
T93 (P Loop) – S203 (Loop 9/Sw1)	2.82 (0.13)	5.96 (0.96)	3.14	2.82	5.64	2.82
T93 (P Loop) – D232 (Loop 11/Sw2)	2.72 (0.14)	5.35 (0.56)	2.63	2.72	5.26	2.54
T93 (P Loop) – R191 (Loop 9/Sw1)	4.15 (0.41)	6.58 (0.77)	2.43	4.15	6.07	1.92
F117 (α2b) – Y121 (α2b)	3.16 (0.37)	5.65 (0.90)	2.49	3.16	5.46	2.3
D118 (α2b) – Y121 (α2b)	3.69 (0.49)	6.12 (0.43)	2.43	3.69	5.86	2.17
I120 (α2b) – M123 (α2b)	3.45 (0.43)	5.47 (0.33)	2.02	3.45	5.38	1.93
Y121 (α2b) – E128 (β4)	9.69 (0.97)	3.87 (1.31)	-5.82	6.54	3.82	-2.72
Y121 (α2b) – L127 (β4)	8.42 (0.79)	4.40 (1.10)	-4.02	6.52	4.33	-2.19
Y121 (α2b) – F129 (β4)	5.89 (0.94)	3.21 (0.29)	-2.68	5.61	3.21	-2.4
Y121 (α2b) – D124 (α2b)	6.29 (0.53)	4.20 (0.76)	-2.09	5.95	4.18	-1.77
M123 (α2b) – Q215 (β6)	5.18 (1.50)	8.54 (1.20)	3.36	4.93	6.49	1.56
K151 (Loop 8a) – T170 (Loop 8c)	5.93 (2.43)	3.61 (1.19)	-2.32	5.08	3.56	-1.52
E158 (β5b) – R280 (Loop 12)	6.64 (1.32)	3.44 (0.65)	-3.2	5.92	3.44	-2.48
K188 (α3) – H201 (Loop 9/Sw1)	4.17 (1.65)	6.38 (1.44)	2.21	3.99	5.78	1.79
H192 (Loop 9/Sw1) – E251 (Loop 11/Sw2)	6.49 (1.49)	3.94 (0.94)	-2.55	5.81	3.92	-1.89
K214 (β6) – E336 (NL)	4.49 (1.68)	48.05 (2.94)	43.56	4.32	6.55	2.23
L224 (β7) – E336 (NL)	5.32 (1.59)	46.81 (3.07)	41.49	5.01	6.55	1.54
L224 (β7) – N334 (NL)	4.40 (1.16)	45.88 (3.41)	41.48	4.33	6.55	2.22
S225 (β7) – E336 (NL)	3.24 (0.85)	45.90 (2.68)	42.66	3.23	6.55	3.32
S225 (β7) – N334 (NL)	2.98 (0.18)	44.78 (2.97)	41.8	2.98	6.55	3.57
G226 (β7) – N334 (NL)	4.06 (0.56)	42.61 (2.93)	38.55	4.05	6.55	2.5
K227 (β7) – N334 (NL)	5.01 (1.19)	39.08 (2.74)	34.07	4.86	6.55	1.69
K227 (β7) – D290 (α5)	7.30 (1.05)	2.91 (0.39)	-4.39	6.27	2.91	-3.36
K227 (β7) – S291 (α5)	8.22 (0.55)	3.96 (0.98)	-4.26	6.53	3.93	-2.6
Y229 (β7) – C296 (β8)	4.79 (0.88)	8.40 (0.49)	3.61	4.73	6.54	1.81
Y229 (β7) – L288 (α5)	6.05 (1.24)	3.66 (0.38)	-2.39	5.63	3.65	-1.98
Y229 (β7) – D290 (α5)	6.28 (0.96)	4.04 (0.86)	-2.24	5.86	4.04	-1.82
E237 (Loop 11/Sw2) – T242 (Loop 11/Sw2)	3.67 (1.11)	7.79 (2.77)	4.12	3.64	5.76	2.12
K238 (Loop 11/Sw2) – E313 (α6)	4.02 (1.54)	6.22 (1.34)	2.2	3.88	5.72	1.84
K241 (Loop 11/Sw2) – E313 (α6)	4.81 (2.33)	8.62 (2.62)	3.81	4.34	6.14	1.8
L259 (α4) – F320 (α6)	5.57 (0.53)	3.93 (0.40)	-1.64	5.44	3.92	-1.52
G263 (α4) – R323 (α6)	5.41 (0.61)	3.47 (0.45)	-1.94	5.3	3.47	-1.83
N264 (α4) – R323 (α6)	7.15 (0.67)	4.56 (0.95)	-2.59	6.33	4.51	-1.82
I266 (α4) – I327 (NL)	3.78 (0.30)	13.78 (2.67)	10	3.78	6.55	2.77
I266 (α4) – F320 (α6)	3.74 (0.27)	5.39 (0.91)	1.65	3.74	5.24	1.5
L269 (α4) – I327 (NL)	3.73 (0.19)	14.18 (3.12)	10.45	3.73	6.55	2.82
L269 (α4) – T326 (NL)	5.11 (0.73)	11.35 (3.04)	6.24	5.03	6.54	1.51
L269 (α4) – K274 (Loop 12)	4.55 (1.18)	7.57 (2.10)	3.02	4.44	5.95	1.51
L269 (α4) – G294 (Loop 13)	6.85 (0.93)	4.24 (0.55)	-2.61	6.15	4.23	-1.92
A270 (α4) – I327 (NL)	4.18 (0.47)	11.03 (2.65)	6.85	4.17	6.55	2.38
A270 (α4) – T326 (NL)	3.87 (0.65)	8.13 (2.60)	4.26	3.86	6.15	2.29
A270 (α4) – K325 (α6)	6.92 (0.61)	5.02 (2.14)	-1.9	6.26	4.53	-1.73
K274 (Loop 12) – V277 (Loop 12)	4.00 (0.89)	5.88 (1.24)	1.88	3.97	5.54	1.57
Q289 (α5) – G294 (Loop 13)	4.00 (0.46)	7.34 (0.62)	3.34	4	6.4	2.4
D290 (α5) – G294 (Loop 13)	3.26 (0.21)	8.35 (0.55)	5.09	3.26	6.53	3.27
D290 (α5) – N295 (Loop 13)	2.96 (0.18)	6.82 (0.76)	3.86	2.96	6.19	3.23
S291 (α5) – N329 (NL)	4.52 (1.61)	28.64 (2.74)	24.12	4.39	6.55	2.16
S291 (α5) – G294 (Loop 13)	4.51 (0.48)	7.02 (0.55)	2.51	4.5	6.31	1.81
L292 (Loop 13) – N329 (NL)	5.28 (1.36)	24.96 (2.82)	19.68	5.04	6.55	1.51
L292 (Loop 13) – I327 (NL)	5.06 (0.77)	20.43 (2.93)	15.37	4.98	6.55	1.57
L292 (Loop 13) – C296 (β8)	5.73 (0.40)	4.03 (0.62)	-1.7	5.59	4.02	-1.57
G293 (Loop 13) – T330 (NL)	4.68 (1.17)	27.87 (3.34)	23.19	4.6	6.55	1.95
G293 (Loop 13) – N329 (NL)	3.99 (1.54)	25.33 (3.26)	21.34	3.85	6.55	2.7
G293 (Loop 13) – K328 (NL)	4.61 (0.95)	21.76 (5.16)	17.15	4.55	6.55	2
G293 (Loop 13) – I327 (NL)	5.03 (0.95)	20.25 (3.50)	15.22	4.92	6.55	1.63
G293 (Loop 13) – C296 (β8)	6.10 (0.40)	3.15 (0.41)	-2.95	5.84	3.14	-2.7
G293 (Loop 13) – T298 (β8)	6.13 (0.55)	3.39 (0.86)	-2.74	5.85	3.37	-2.48
G294 (Loop 13) – T330 (NL)	3.15 (0.37)	28.15 (3.47)	25	3.15	6.55	3.4
G294 (Loop 13) – V331 (NL)	4.95 (1.15)	29.62 (1.77)	24.67	4.81	6.55	1.74
G294 (Loop 13) – N329 (NL)	3.88 (1.34)	25.61 (3.43)	21.73	3.79	6.55	2.76
N295 (Loop 13) – V333 (NL)	4.54 (1.00)	34.80 (1.64)	30.26	4.51	6.55	2.04
N295 (Loop 13) – S332 (NL)	3.15 (0.50)	33.04 (2.48)	29.89	3.15	6.55	3.4
N295 (Loop 13) – V331 (NL)	4.23 (1.38)	31.79 (1.73)	27.56	4.12	6.55	2.43
N295 (Loop 13) – T330 (NL)	3.62 (0.44)	30.39 (3.25)	26.77	3.62	6.55	2.93
C296 (β8) – V331 (NL)	4.81 (1.74)	29.63 (1.66)	24.82	4.5	6.55	2.05
C296 (β8) – N329 (NL)	3.33 (0.83)	25.98 (2.97)	22.65	3.32	6.55	3.23
R297 (β8) – V331 (NL)	3.97 (0.39)	28.28 (2.24)	24.31	3.97	6.55	2.58
R297 (β8) – N329 (NL)	4.47 (0.64)	25.01 (2.38)	20.54	4.46	6.55	2.09
T298 (β8) – N329 (NL)	3.90 (0.89)	21.62 (2.70)	17.72	3.89	6.55	2.66
I300 (β8) – A324 (α6)	4.03 (0.40)	7.63 (2.61)	3.6	4.03	5.87	1.84
F320 (α6) – A324 (α6)	2.97 (0.14)	6.13 (1.73)	3.16	2.97	5.48	2.51
G321 (α6) – K325 (α6)	3.13 (0.20)	7.02 (1.68)	3.89	3.13	5.95	2.82
Q322 (α6) – K325 (α6)	3.39 (0.38)	5.37 (1.02)	1.98	3.39	5.21	1.82
R323 (α6) – I327 (NL)	4.15 (0.36)	9.64 (1.00)	5.49	4.15	6.54	2.39
R323 (α6) – T326 (NL)	3.03 (0.39)	6.24 (1.01)	3.21	3.03	5.81	2.78
A324 (α6) – I327 (NL)	3.31 (0.23)	6.66 (0.76)	3.35	3.31	6.11	2.8
All residue pairs listed, with their secondary structure location in parenthesis, have a significant (p < 0.05) difference between the apo and ATP simulation replicates for the wild-type motor. Standard deviation values and masked distances are also listed. Abbreviations: CS, cover strand; NL, neck linker.
