# Supplementary material for: Neck linker docking is critical for Kinesin-1 force generation in cells but at a cost to motor speed and processivity
Source: eLife journal article supplement (doi:10.7554/elife.44146), 2019-05-14
Supplement: supp [file elife-44146-supp-v1.zip › elife_poa_e44146_Supplementary_File_2.xlsx]

## Sheet: dist_table
Supplementary File 2. Average Residue-Residue Distances From Molecular Dynamics Simulations
Positions	WT distance (Å)	Latch mutant distance (Å)	Mutant – WT distance (Å)	WT masked distance (Å)	Latch mutant masked distance (Å)	Mutant – WT masked distance (Å)
D27 (Loop 2a) – F309 (Loop 14)	4.63 (1.32)	7.41 (1.32)	2.78	4.51	6.22	1.71
D27 (Loop 2a) – S307 (Loop 14)	4.12 (2.30)	6.34 (2.00)	2.22	3.74	5.48	1.74
G42 (Loop 2c) – K45 (β2c)	4.66 (1.40)	6.52 (0.69)	1.86	4.53	6.05	1.52
D50 (Loop 2d) – K325 (α6)	5.68 (1.03)	4.06 (1.55)	-1.62	5.47	3.97	-1.5
E76 (α1) – V333 (NL)	4.42 (0.92)	10.38 (4.68)	5.96	4.37	6.37	2
G77 (α1) – N334 (NL)	2.97 (0.21)	8.81 (4.94)	5.84	2.97	5.38	2.41
G77 (α1) – V333 (NL)	3.56 (0.47)	9.15 (4.19)	5.59	3.56	5.91	2.35
G77 (α1) – S332 (NL)	4.94 (0.57)	9.16 (2.35)	4.22	4.89	6.41	1.52
Y78 (β3) – V331 (NL)	3.97 (0.40)	6.20 (1.87)	2.23	3.97	5.51	1.54
N79 (β3) – N334 (NL)	3.61 (1.21)	10.41 (3.70)	6.8	3.57	6.36	2.79
T88 (P Loop) – T242 (Loop 11/Sw2)	8.03 (1.27)	5.57 (3.09)	-2.46	6.45	4.49	-1.96
T88 (P Loop) – N199 (Loop 9/Sw1)	6.27 (1.50)	4.12 (0.54)	-2.15	5.7	4.11	-1.59
Y139 (β4) – E251 (Loop 11/Sw2)	3.19 (0.97)	5.01 (1.39)	1.82	3.18	4.83	1.65
R172 (Loop 8c) – E186 (α3)	3.59 (1.53)	5.33 (1.74)	1.74	3.5	5	1.5
T196 (Loop 9/Sw1) – T242 (Loop 11/Sw2)	9.41 (1.82)	4.92 (2.50)	-4.49	6.48	4.27	-2.21
T196 (Loop 9/Sw1) – E237 (Loop 11/Sw2)	6.97 (1.38)	4.49 (0.83)	-2.48	6.06	4.45	-1.61
N197 (Loop 9/Sw1) – T242 (Loop 11/Sw2)	9.47 (2.70)	3.70 (1.43)	-5.77	6.28	3.61	-2.67
N197 (Loop 9/Sw1) – G243 (Loop 11/Sw2)	11.00 (3.86)	5.35 (2.57)	-5.65	6.09	4.57	-1.52
M198 (Loop 9/Sw1) – K241 (Loop 11/Sw2)	11.86 (2.69)	6.03 (2.98)	-5.83	6.52	4.91	-1.61
M198 (Loop 9/Sw1) – T242 (Loop 11/Sw2)	10.80 (1.79)	5.19 (2.49)	-5.61	6.54	4.49	-2.05
M198 (Loop 9/Sw1) – F309 (Loop 14)	8.53 (1.68)	5.09 (1.45)	-3.44	6.45	4.86	-1.59
R204 (Loop 9/Sw1) – E251 (Loop 11/Sw2)	3.42 (1.14)	6.06 (2.39)	2.64	3.39	5.21	1.82
R204 (Loop 9/Sw1) – E237 (Loop 11/Sw2)	5.34 (1.95)	3.16 (0.75)	-2.18	4.89	3.16	-1.73
K214 (β6) – E336 (NL)	4.49 (1.68)	16.34 (6.66)	11.85	4.32	6.55	2.23
S225 (β7) – E336 (NL)	3.24 (0.85)	11.96 (6.28)	8.72	3.23	6.18	2.95
S225 (β7) – N334 (NL)	2.98 (0.18)	11.17 (4.91)	8.19	2.98	6.19	3.21
G226 (β7) – N334 (NL)	4.06 (0.56)	12.81 (4.77)	8.75	4.05	6.51	2.46
K227 (β7) – N334 (NL)	5.01 (1.19)	13.14 (3.74)	8.13	4.86	6.55	1.69
G246 (Loop 11/Sw2) – D250 (Loop 11/Sw2)	3.13 (0.31)	5.17 (2.11)	2.04	3.13	4.69	1.56
All residue pairs listed, with their secondary structure location in parenthesis, have a significant (p < 0.05) difference between wild type and Latch mutant simulation replicates. Standard deviation values and masked distances are also listed. Abbreviations: CS, cover strand; NL, neck linker.
