# Supplementary material for: Neck linker docking is critical for Kinesin-1 force generation in cells but at a cost to motor speed and processivity
Source: eLife journal article supplement (doi:10.7554/elife.44146), 2019-05-14
Supplement: supp [file elife-44146-supp-v1.zip › elife_poa_e44146_Supplementary_File_3.xlsx]

## Sheet: dist_table
Supplementary File 3. Average Residue-Residue Distances From Molecular Dynamics Simulations
Positions	WT distance (Å)	CNB+Latch mutant distance (Å)	Mutant – WT distance (Å)	WT masked distance (Å)	NCB+Latch mutant masked distance (Å)	Mutant – WT masked distance (Å)
D3 (CS) – K328 (NL)	11.38 (2.88)	6.45 (4.02)	-4.93	6.47	4.69	-1.78
D3 (CS) – C7 (CS)	8.35 (2.73)	5.43 (2.70)	-2.92	5.88	4.62	-1.26
D3 (CS) – E6 (CS)	5.98 (1.79)	4.28 (1.74)	-1.7	5.46	4.1	-1.36
P4 (CS) – V333 (NL)	10.00 (3.78)	4.58 (1.89)	-5.42	6.38	4.27	-2.11
A5 (CS) – V333 (NL)	10.14 (3.21)	5.25 (1.19)	-4.89	6.51	5.06	-1.45
A5 (CS) – N329 (NL)	5.69 (2.02)	3.83 (1.03)	-1.86	5.06	3.79	-1.27
E6 (CS) – I9 (CS)	7.48 (0.74)	5.33 (2.14)	-2.15	6.39	4.84	-1.55
C7 (CS) – L335 (NL)	16.03 (0.96)	7.77 (4.61)	-8.26	6.55	5.1	-1.45
C7 (CS) – V333 (NL)	10.58 (0.94)	5.41 (2.07)	-5.17	6.55	4.88	-1.67
C7 (CS) – N329 (NL)	2.89 (0.13)	4.77 (1.89)	1.88	2.89	4.54	1.65
C7 (CS) – K328 (NL)	3.45 (0.24)	4.99 (1.61)	1.54	3.45	4.77	1.32
S8 (CS) – V333 (NL)	14.19 (0.66)	7.27 (3.64)	-6.92	6.55	5.15	-1.4
S8 (CS) – V331 (NL)	7.13 (0.67)	4.67 (1.10)	-2.46	6.32	4.59	-1.73
S8 (CS) – I327 (NL)	3.50 (0.22)	5.26 (1.79)	1.76	3.5	4.91	1.41
S8 (CS) – K328 (NL)	3.81 (0.49)	5.29 (1.22)	1.48	3.81	5.1	1.29
R14 (β1) – ATP	3.69 (0.50)	5.56 (2.15)	1.87	3.69	4.96	1.27
R16 (β1) – E22 (α0)	5.28 (2.58)	2.72 (0.07)	-2.56	4.62	2.72	-1.9
L18 (α0) – ATP	6.82 (0.60)	5.09 (1.27)	-1.73	6.22	4.94	-1.28
N19 (α0) – ATP	5.90 (1.25)	3.80 (0.83)	-2.1	5.56	3.79	-1.77
N19 (α0) – M198 (Loop 9/Sw1)	3.91 (1.19)	5.29 (0.79)	1.38	3.82	5.18	1.36
A21 (α0) – N197 (Loop 9/Sw1)	5.06 (2.25)	6.62 (1.08)	1.56	4.56	6	1.44
E22 (α0) – ATP	8.99 (1.95)	4.86 (0.42)	-4.13	6.39	4.83	-1.56
E22 (α0) – S89 (P Loop)	7.49 (1.97)	4.40 (1.29)	-3.09	6.04	4.34	-1.7
R25 (α0) – M198 (Loop 9/Sw1)	7.38 (2.28)	3.92 (0.56)	-3.46	5.93	3.91	-2.02
I41 (β2b) – K45 (β2c)	4.04 (0.98)	5.63 (0.67)	1.59	4.03	5.47	1.44
G42 (Loop 2c) – K45 (β2c)	4.66 (1.40)	6.44 (0.68)	1.78	4.53	6.01	1.48
Q59 (α1) – R111 (α2b)	4.20 (0.83)	5.91 (0.42)	1.71	4.17	5.71	1.54
Q69 (α1) – E336 (NL)	18.86 (0.96)	8.62 (5.60)	-10.24	6.55	5.1	-1.45
I70 (α1) – G80 (β3)	5.13 (1.25)	7.00 (0.52)	1.87	4.94	6.31	1.37
K72 (α1) – E336 (NL)	14.82 (0.99)	7.55 (5.01)	-7.27	6.55	4.88	-1.67
D73 (α1) – S332 (NL)	8.03 (0.45)	5.48 (2.77)	-2.55	6.53	4.65	-1.88
V74 (α1) – G80 (β3)	4.56 (0.62)	6.20 (0.54)	1.64	4.54	5.9	1.36
E76 (α1) – V333 (NL)	4.42 (0.92)	7.68 (2.08)	3.26	4.37	6.04	1.67
G77 (α1) – N334 (NL)	2.97 (0.21)	13.38 (1.03)	10.41	2.97	6.55	3.58
G77 (α1) – V333 (NL)	3.56 (0.47)	10.85 (0.76)	7.29	3.56	6.55	2.99
G77 (α1) – S332 (NL)	4.94 (0.57)	9.82 (2.29)	4.88	4.89	6.52	1.63
Y78 (β3) – N334 (NL)	4.50 (0.47)	8.64 (1.10)	4.14	4.49	6.5	2.01
Y78 (β3) – V331 (NL)	3.97 (0.40)	6.88 (0.81)	2.91	3.97	6.2	2.23
Y78 (β3) – V333 (NL)	3.63 (0.25)	6.21 (0.93)	2.58	3.63	5.83	2.2
N79 (β3) – N334 (NL)	3.61 (1.21)	13.19 (1.58)	9.58	3.57	6.55	2.98
N79 (β3) – S332 (NL)	5.29 (0.37)	8.61 (1.42)	3.32	5.22	6.48	1.26
N79 (β3) – G226 (β7)	3.63 (0.28)	5.34 (0.38)	1.71	3.63	5.27	1.64
N79 (β3) – Y229 (β7)	5.77 (0.73)	4.23 (0.85)	-1.54	5.57	4.2	-1.37
Q87 (P Loop) – K238 (Loop 11/Sw2)	7.18 (1.32)	4.84 (0.88)	-2.34	6.15	4.77	-1.38
Q87 (P Loop) – M198 (Loop 9/Sw1)	8.29 (1.51)	6.94 (3.24)	-1.35	6.41	5.14	-1.27
Q104 (Loop 5) – R111 (α2b)	4.10 (0.98)	6.26 (1.40)	2.16	4.06	5.7	1.64
K151 (Loop 8a) – T170 (Loop 8c)	5.93 (2.43)	3.46 (1.04)	-2.47	5.08	3.42	-1.66
K151 (Loop 8a) – G168 (Loop 8c)	4.87 (2.00)	3.07 (0.46)	-1.8	4.52	3.07	-1.45
A194 (Loop 9/Sw1) – E251 (Loop 11/Sw2)	6.43 (1.15)	4.53 (0.81)	-1.9	5.89	4.5	-1.39
T196 (Loop 9/Sw1) – E237 (Loop 11/Sw2)	6.97 (1.38)	4.35 (0.64)	-2.62	6.06	4.33	-1.73
T196 (Loop 9/Sw1) – R204 (Loop 9/Sw1)	5.99 (1.82)	4.03 (0.60)	-1.96	5.37	4.02	-1.35
N197 (Loop 9/Sw1) – F309 (Loop 14)	9.36 (2.39)	4.53 (1.06)	-4.83	6.39	4.44	-1.95
M198 (Loop 9/Sw1) – F309 (Loop 14)	8.53 (1.68)	5.13 (1.38)	-3.4	6.45	4.93	-1.52
M198 (Loop 9/Sw1) – N310 (α6)	7.64 (1.65)	6.53 (3.17)	-1.11	6.23	4.97	-1.26
R204 (Loop 9/Sw1) – N254 (Loop 11/Sw2)	7.35 (0.67)	4.82 (1.88)	-2.53	6.39	4.57	-1.82
R204 (Loop 9/Sw1) – E237 (Loop 11/Sw2)	5.34 (1.95)	3.02 (0.68)	-2.32	4.89	3.01	-1.88
K214 (β6) – E336 (NL)	4.49 (1.68)	21.72 (3.38)	17.23	4.32	6.55	2.23
K223 (β7) – L335 (NL)	6.23 (2.81)	21.43 (3.36)	15.2	5.1	6.55	1.45
K223 (β7) – E336 (NL)	5.60 (1.94)	20.55 (3.09)	14.95	5.08	6.55	1.47
L224 (β7) – N334 (NL)	4.40 (1.16)	15.71 (1.48)	11.31	4.33	6.55	2.22
L224 (β7) – L335 (NL)	6.18 (2.26)	17.13 (3.20)	10.95	5.29	6.54	1.25
L224 (β7) – E336 (NL)	5.32 (1.59)	16.11 (2.94)	10.79	5.01	6.55	1.54
S225 (β7) – E336 (NL)	3.24 (0.85)	18.40 (3.01)	15.16	3.23	6.55	3.32
S225 (β7) – N334 (NL)	2.98 (0.18)	17.24 (0.99)	14.26	2.98	6.55	3.57
G226 (β7) – N334 (NL)	4.06 (0.56)	17.06 (0.96)	13	4.05	6.55	2.5
K227 (β7) – N334 (NL)	5.01 (1.19)	16.45 (1.36)	11.44	4.86	6.55	1.69
Y229 (β7) – C296 (β8)	4.79 (0.88)	6.44 (0.62)	1.65	4.73	6.03	1.3
E237 (Loop 11/Sw2) – T242 (Loop 11/Sw2)	3.67 (1.11)	6.35 (2.66)	2.68	3.64	5.18	1.54
E237 (Loop 11/Sw2) – N256 (α4)	4.12 (1.18)	5.79 (0.85)	1.67	4.07	5.55	1.48
K238 (Loop 11/Sw2) – N256 (α4)	5.21 (1.58)	8.03 (1.06)	2.82	4.93	6.46	1.53
G272 (Loop 12) – H276 (Loop 12)	7.05 (0.72)	4.90 (1.44)	-2.15	6.28	4.74	-1.54
N295 (Loop 13) – N334 (NL)	5.23 (1.11)	12.33 (0.96)	7.1	5.09	6.55	1.46
N295 (Loop 13) – V333 (NL)	4.54 (1.00)	8.77 (1.28)	4.23	4.51	6.5	1.99
N295 (Loop 13) – S332 (NL)	3.15 (0.50)	6.52 (0.66)	3.37	3.15	6.06	2.91
R297 (β8) – E336 (NL)	14.16 (1.35)	8.70 (5.04)	-5.46	6.55	5.2	-1.35
R297 (β8) – V333 (NL)	7.56 (1.19)	4.84 (0.99)	-2.72	6.34	4.76	-1.58
All residue pairs listed, with their secondary structure location in parenthesis, have a significant (p < 0.05) difference between wild type and CNB+Latch mutant simulation replicates. Standard deviation values and masked distances are also listed. Abbreviations: CS, cover strand; NL, neck linker.
